# Supplementary material
Source: PubMed Central journal article supplement (PMC4326956)

## Supplementary information

**Fig. S1.** Prolonged IGF-1 treatment induces cellular senescence in cancer cells.

(A) IMR90 cells were serum-starved with 0.5% FBS for four days and then treated with 50 ng/mL IGF-1 every other day for six days. Cells were analyzed by flow cytometry at the indicated time points. (B) MCF7, HCT116(p53<sup>+/+</sup>) and HCT116(p53<sup>-/-</sup>) cells were serum-starved for four days and then treated with 50 ng/mL IGF-1 every other day for six days. Cells were then assayed for senescence-associated  $\beta$ -Galactosidase (SA- $\beta$ -Gal) activity and photographed under a light microscope. (C) Senescent cells were quantified by counting the number of SA- $\beta$ -Gal-positive cells over the total number of cells from four randomly selected fields of each cell culture plate. Results are presented as means and SE from two experiments. \*: P < 0.01.

**Fig. S2.** IGF-1 treatment does not affect the SIRT1-DBC1 interaction. (A – B) MCF7 cells were serum-starved for 48 hours, and subsequently treated with 50 ng/mL IGF-1 for 12 hours. (A) Cells were collected and subjected to immunoprecipitation (IP) with a specific DBC1 antibody and then analyzed by immunoblotting (IB), as indicated. Two representative independent experiments are shown. (B) Cells were collected and subjected to IP with a specific SIRT1 antibody and then analyzed by IB, as indicated. One representative experiment

is shown. (C) MCF7, IMR90 and A549 cells were grown under normal growth conditions. Whole-cell lysates were subjected to western blotting, as shown.

**(A)**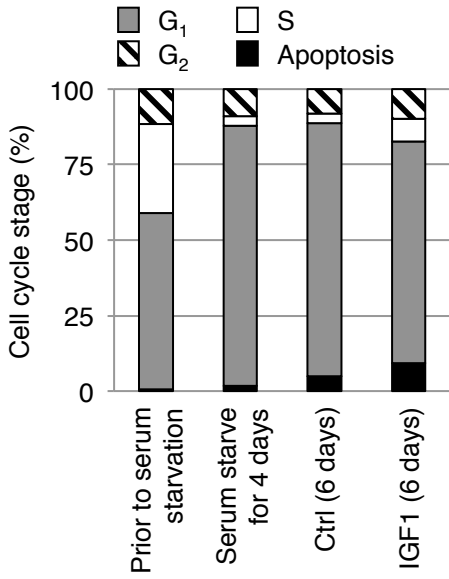**(B)**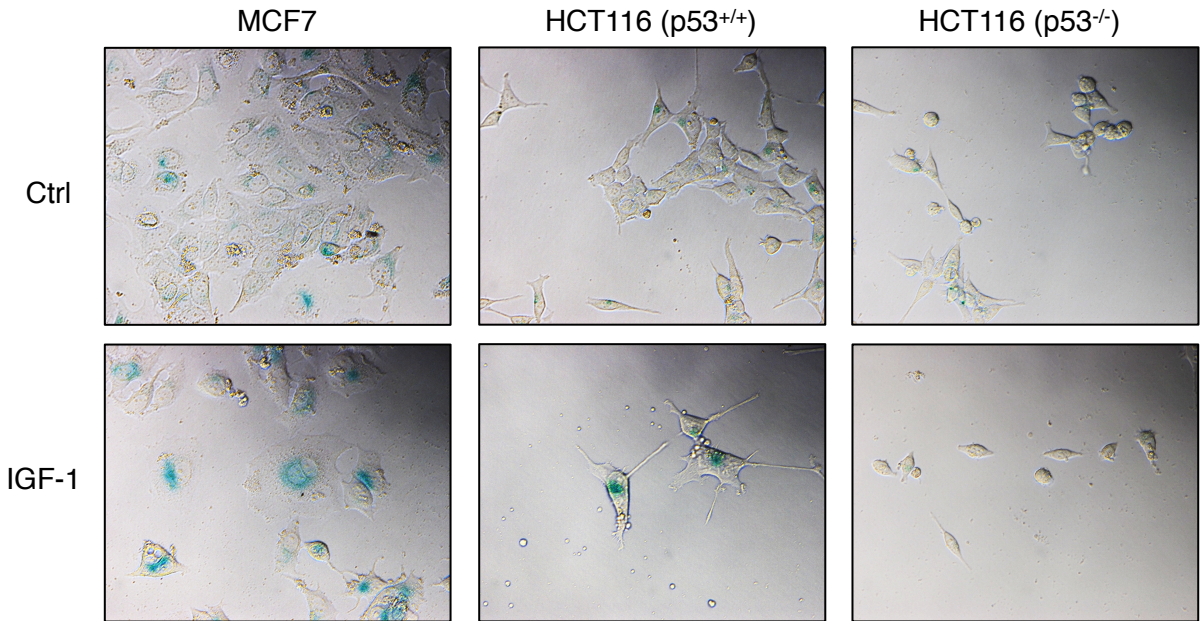**(C)**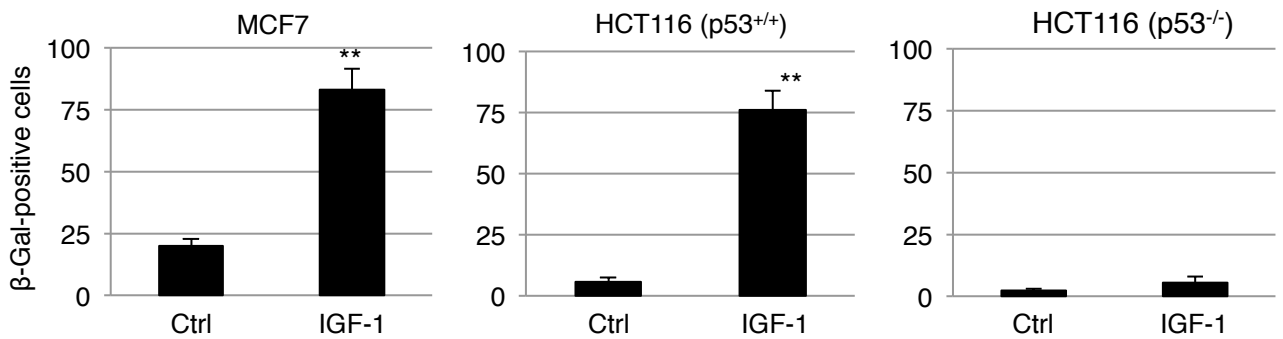

**(A)**

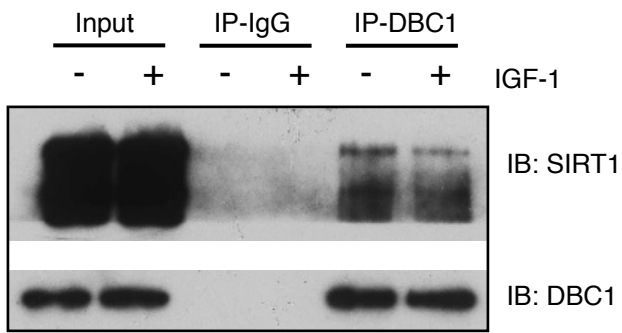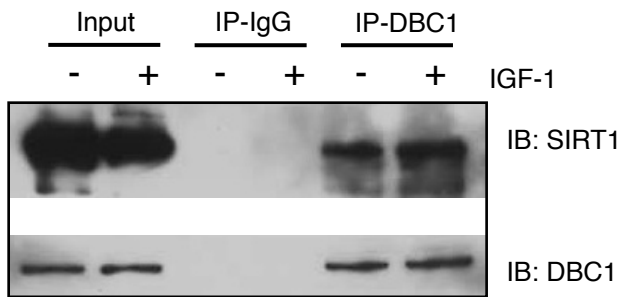

**(B)**

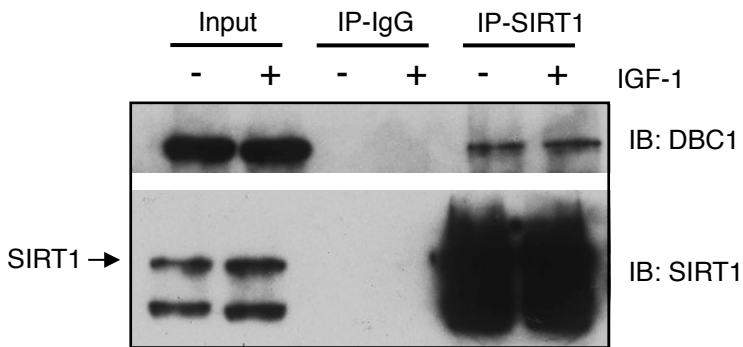

**(C)**

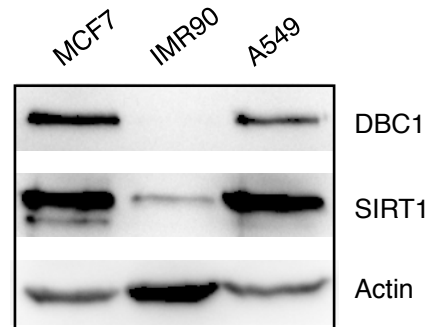

Supplement: acel0013-0669-sd1.pdf [file acel0013-0669-sd1.pdf]
